# Supplementary material for: Depression, periodontitis, caries and missing teeth in the USA, NHANES 2009–2014
Source: HighWire-hosted journal article supplement (doi:10.1136/fmch-2020-000583), 2020-12-01

**Supplementary Figure 1:** Directed acyclic graph (DAG) of the causal assumptions between depressive symptoms, oral diseases, and the confounding factors.

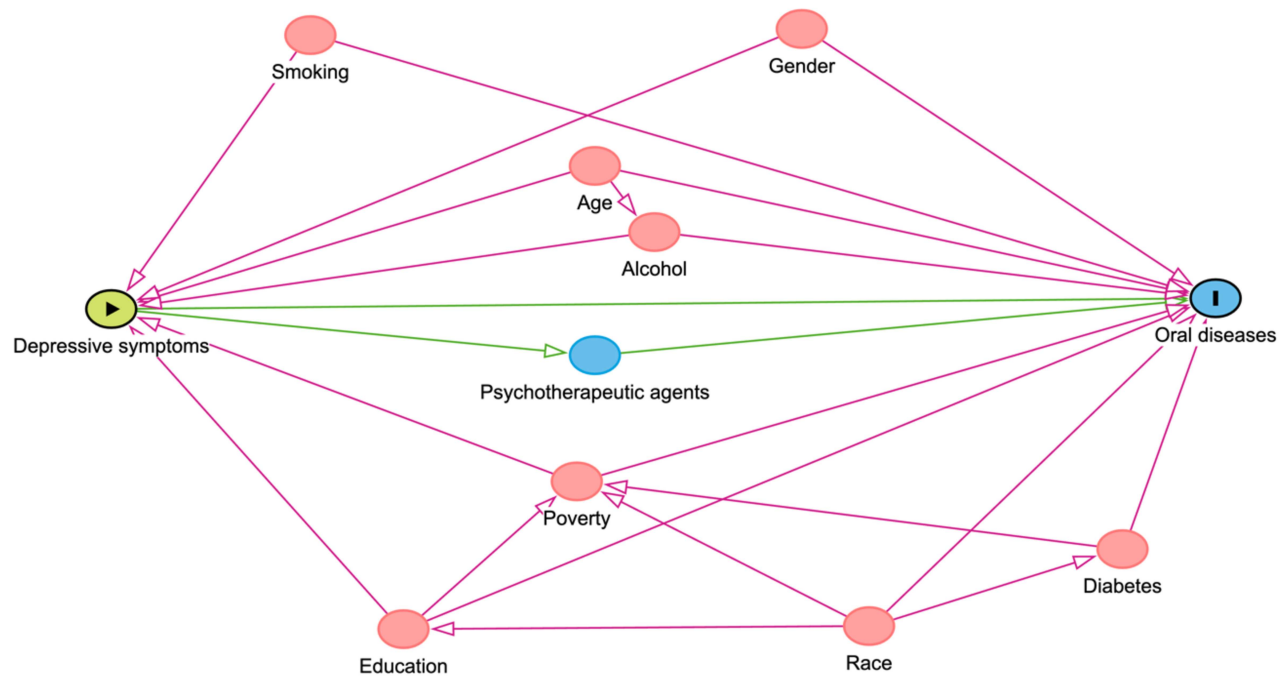

Supplement: fmch-2020-000583supp001_data_supplement.pdf [file fmch-2020-000583supp001_data_supplement.pdf]
